# Supplementary material for: Feedstock-agnostic reductive catalytic fractionation in alcohol and alcohol–water mixtures
Source: Royal Society of Chemistry journal article supplement (doi:10.1039/d2gc04464a), 2023-01-01
Supplement: d2gc04464a1.pdf [file d2gc04464a1.pdf]

## Electronic Supporting Information for

### Feedstock-agnostic reductive catalytic fractionation in alcohol and alcohol-water mixtures

Jun Hee Jang<sup>1,‡</sup>, Ana Rita C. Morais<sup>1,‡</sup>, Megan Browning<sup>1</sup>, David G. Brandner<sup>1,2</sup>, Jacob K. Kenny<sup>1,2</sup>, Lisa M. Stanley<sup>1</sup>, Renee M. Happs<sup>1,2</sup>, Anjaneya S. Kovvali<sup>3,4</sup>, Joshua I. Cutler<sup>5</sup>, Yuriy Román-Leshkov<sup>6,\*</sup>, James R. Bielenberg<sup>4,\*</sup>, and Gregg T. Beckham<sup>1,2,\*</sup>

‡Co-first author

1. Renewable Resources and Enabling Sciences Center, National Renewable Energy Laboratory, Golden, CO 80401, USA
2. Center for Bioenergy Innovation, Oak Ridge National Laboratory, Oak Ridge, TN 37830, USA
3. Office of Clean Energy Demonstrations, U.S. Department of Energy, Washington, DC 20585, USA
4. ExxonMobil Research and Engineering, Clinton, NJ 08809, USA
5. ExxonMobil Chemical Company, Baytown, TX 77520, USA
6. Department of Chemical Engineering, Massachusetts Institute of Technology, Cambridge, MA 02139, USA

\* Correspondence: [gregg.beckham@nrel.gov](mailto:gregg.beckham@nrel.gov) (G.T.B.), [james.bielenberg@exxonmobil.com](mailto:james.bielenberg@exxonmobil.com) (J.R.B.), [yroman@mit.edu](mailto:yroman@mit.edu) (Y.R.-L.)

**Table S1.** Compositional analysis of parent and post-RCF pulp samples in methanol or methanol/water mixture.

| Sample      | Water                       | Ash  | Extractives | Protein | Free sugars | Lignin | Glucan | Xylan | Galactan | Arabinan | Mannan | Acetyl | Total | Isolated sample | Delignification <sup>b</sup> | Glucan retention rate <sup>c</sup> | Xylan retention rate <sup>d</sup> |        |
|-------------|-----------------------------|------|-------------|---------|-------------|--------|--------|-------|----------|----------|--------|--------|-------|-----------------|------------------------------|------------------------------------|-----------------------------------|--------|
| Poplar      | Native (As-received)        | 3.0% | 0.6%        | 3.7%    | 0.4%        | 0.0%   | 25.2%  | 43.9% | 12.8%    | 1.3%     | 0.1%   | 2.7%   | 3.7%  | 97.4%           | 2.70 g                       | -                                  | -                                 | -      |
|             | Native (Dried) <sup>a</sup> | -    | 0.6%        | 3.8%    | 0.4%        | 0.0%   | 26.0%  | 45.3% | 13.2%    | 1.3%     | 0.1%   | 2.8%   | 3.8%  | 97.3%           | 2.62 g                       | -                                  | -                                 | -      |
|             | MeOH                        | 0.0% | 0.8%        | 0.0%    | 0.0%        | 0.0%   | 13.7%  | 65.4% | 19.7%    | 1.4%     | 0.0%   | 3.4%   | 0.1%  | 104.5%          | 1.78 g                       | 64.0%                              | 98.4%                             | 101.4% |
|             | MeOH/H <sub>2</sub> O       | 0.0% | 8.4%        | 0.0%    | 0.0%        | 0.0%   | 4.2%   | 83.3% | 4.3%     | 0.8%     | 0.0%   | 2.7%   | 0.0%  | 103.7%          | 1.23 g                       | 92.5%                              | 86.1%                             | 15.2%  |
| Switchgrass | Native (As-received)        | 5.7% | 4.4%        | 7.7%    | 0.0%        | 3.4%   | 16.1%  | 31.8% | 20.4%    | 1.3%     | 3.0%   | 0.0%   | 2.2%  | 96.0%           | 2.70 g                       | -                                  | -                                 | -      |
|             | Native (Dried) <sup>a</sup> | -    | 4.6%        | 8.1%    | 0.0%        | 3.6%   | 17.1%  | 33.8% | 21.6%    | 1.3%     | 3.1%   | 0.0%   | 2.4%  | 95.6%           | 2.55 g                       | -                                  | -                                 | -      |
|             | MeOH                        | 0.0% | 5.5%        | 0.0%    | 0.0%        | 0.0%   | 8.6%   | 48.6% | 30.7%    | 1.6%     | 3.8%   | 0.0%   | 0.0%  | 98.8%           | 1.80 g                       | 64.6%                              | 101.7%                            | 100.2% |
|             | MeOH/H <sub>2</sub> O       | 0.0% | 6.1%        | 0.0%    | 0.0%        | 0.0%   | 2.5%   | 79.7% | 10.0%    | 0.8%     | 0.4%   | 0.0%   | 0.1%  | 99.6%           | 0.96 g                       | 94.5%                              | 88.5%                             | 17.4%  |
| Corn stover | Native (As-received)        | 3.0% | 1.9%        | 8.3%    | 0.0%        | 0.4%   | 17.5%  | 37.0% | 21.4%    | 1.0%     | 2.1%   | 0.0%   | 2.1%  | 94.7%           | 2.70 g                       | -                                  | -                                 | -      |
|             | Native (Dried) <sup>a</sup> | -    | 1.9%        | 8.5%    | 0.0%        | 0.4%   | 18.0%  | 38.2% | 22.1%    | 1.0%     | 2.1%   | 0.0%   | 2.2%  | 94.4%           | 2.62 g                       | -                                  | -                                 | -      |
|             | MeOH                        | 0.0% | 2.8%        | 0.0%    | 0.0%        | 0.0%   | 8.0%   | 54.2% | 31.1%    | 1.7%     | 3.4%   | 0.0%   | 0.1%  | 101.3%          | 1.72 g                       | 70.9%                              | 93.6%                             | 92.9%  |
|             | MeOH/H <sub>2</sub> O       | 0.0% | 9.3%        | 0.0%    | 0.0%        | 0.0%   | 2.9%   | 81.3% | 10.2%    | 0.8%     | 0.4%   | 0.0%   | 0.1%  | 105.0%          | 1.24 g                       | 92.5%                              | 101.0%                            | 21.9%  |
| Pine        | Native (As-received)        | 3.9% | 0.8%        | 4.7%    | 0.0%        | 0.1%   | 32.2%  | 36.0% | 6.6%     | 2.4%     | 2.3%   | 10.9%  | 1.2%  | 101.1%          | 2.70 g                       | -                                  | -                                 | -      |
|             | Native (Dried) <sup>a</sup> | -    | 0.9%        | 4.9%    | 0.0%        | 0.1%   | 33.5%  | 37.4% | 6.8%     | 2.5%     | 2.4%   | 11.4%  | 1.2%  | 101.1%          | 2.60 g                       | -                                  | -                                 | -      |
|             | MeOH                        | 0.0% | 0.7%        | 0.0%    | 0.0%        | 0.0%   | 29.2%  | 50.9% | 9.6%     | 2.4%     | 1.5%   | 11.5%  | 0.0%  | 105.8%          | 2.00 g                       | 32.9%                              | 104.9%                            | 108.1% |
|             | MeOH/H <sub>2</sub> O       | 0.0% | 5.5%        | 0.0%    | 0.0%        | 0.0%   | 16.3%  | 72.3% | 4.8%     | 0.9%     | 0.2%   | 5.6%   | 0.0%  | 105.6%          | 1.18 g                       | 77.9%                              | 88.0%                             | 31.9%  |

<sup>a</sup>Sample after drying in a 120°C overnight. <sup>b</sup>Calculated using Equation 3. <sup>c</sup>Calculated using Equation 4. <sup>d</sup>Calculated using Equation 5.

**Table S2.** Phenolic monomer and lignin oil yields from RCF of poplar, pine, switchgrass, and corn stover.

| Temp. | Biomass     | Solvent               | Oil yield <sup>a</sup><br>(wt% total lignin) | Monophenolic monomer yield (wt% total lignin) <sup>b</sup> |     |      |         |        |      |         |        |        |       |                   |                  |                      | HF       |  | total |
|-------|-------------|-----------------------|----------------------------------------------|------------------------------------------------------------|-----|------|---------|--------|------|---------|--------|--------|-------|-------------------|------------------|----------------------|----------|--|-------|
|       |             |                       |                                              | MG                                                         | EG  | PG   | P(ene)G | P(OH)G | PS   | P(ene)S | P(OH)S | Phenol | E(OH) | HC <sup>c,d</sup> | HFA <sup>c</sup> | MHF/EHF <sup>c</sup> |          |  |       |
| 230°C | Poplar      | MeOH                  | 65.1±8.7                                     | 0.0                                                        | 0.0 | 8.3  | 2.5     | 2.1    | 14.1 | 0.7     | 3.7    | 1.2    | 0.0   | 0.0               | 0.0              | 0.0                  | 32.6±2.7 |  |       |
|       |             | EtOH                  | 60.8±3.3                                     | 0.0                                                        | 0.5 | 5.2  | 0.4     | 3.7    | 10.3 | 0.3     | 4.8    | 1.8    | 0.0   | 0.0               | 0.0              | 0.0                  | 27.0±1.7 |  |       |
|       |             | MeOH/H <sub>2</sub> O | 71.4±8.8                                     | 0.0                                                        | 0.4 | 8.3  | 0.6     | 3.1    | 14.8 | 0.4     | 3.6    | 2.2    | 0.0   | 0.0               | 0.0              | 0.0                  | 33.4±0.7 |  |       |
|       |             | EtOH/H <sub>2</sub> O | 73.8±0.8                                     | 0.0                                                        | 0.4 | 4.9  | 0.3     | 6.9    | 8.6  | 0.2     | 9.8    | 1.5    | 0.0   | 0.0               | 0.0              | 0.0                  | 32.6±0.6 |  |       |
|       | Switchgrass | MeOH                  | 81.4±11.6                                    | 0.0                                                        | 0.8 | 6.6  | 0.0     | 2.3    | 6.3  | 0.0     | 2.8    | 0.0    | 2.0   | 5.7               | 0.0              | 5.1                  | 31.6±1.6 |  |       |
|       |             | EtOH                  | 98.8±5.8                                     | 0.0                                                        | 0.7 | 6.2  | 0.0     | 2.9    | 5.7  | 0.0     | 2.9    | 0.0    | 1.7   | 5.1               | 1.7              | 3.4                  | 30.3±0.1 |  |       |
|       |             | MeOH/H <sub>2</sub> O | 96.7±13.3                                    | 0.3                                                        | 1.6 | 4.9  | 0.0     | 3.6    | 6.4  | 0.0     | 3.4    | 0.0    | 2.6   | 5.3               | 2.2              | 3.3                  | 33.5±1.8 |  |       |
|       |             | EtOH/H <sub>2</sub> O | 119.9±21.3                                   | 0.0                                                        | 0.8 | 3.9  | 0.0     | 4.6    | 5.2  | 0.0     | 4.9    | 0.0    | 1.8   | 4.7               | 2.9              | 1.7                  | 30.5±0.4 |  |       |
|       | Corn stover | MeOH                  | 82.8±3.2                                     | 0.0                                                        | 0.4 | 3.5  | 0.0     | 1.5    | 5.5  | 0.0     | 1.9    | 0.0    | 4.2   | 8.5               | 0.0              | 6.6                  | 32.1±1.5 |  |       |
|       |             | EtOH                  | 74.7±16.1                                    | 0.0                                                        | 0.7 | 3.1  | 0.0     | 1.5    | 4.4  | 0.0     | 2.0    | 0.0    | 4.1   | 9.0               | 0.0              | 5.6                  | 30.4±1.7 |  |       |
|       |             | MeOH/H <sub>2</sub> O | 104.5±24.2                                   | 0.0                                                        | 1.4 | 2.9  | 0.0     | 2.6    | 6.1  | 0.0     | 2.0    | 0.0    | 4.5   | 6.7               | 1.8              | 3.0                  | 31.0±0.6 |  |       |
|       |             | EtOH/H <sub>2</sub> O | 114.0±12.1                                   | 0.0                                                        | 1.0 | 2.0  | 0.0     | 3.2    | 5.6  | 0.0     | 2.3    | 0.0    | 3.6   | 7.4               | 3.0              | 2.4                  | 30.5±3.3 |  |       |
|       | Pine        | MeOH                  | 42.5±2.3                                     | 0.0                                                        | 0.3 | 10.4 | 0.3     | 1.7    | 0.0  | 0.0     | 0.0    | 0.0    | 0.0   | 0.0               | 0.0              | 0.0                  | 12.7±0.2 |  |       |
|       |             | EtOH                  | 41.0±3.2                                     | 0.0                                                        | 0.3 | 8.3  | 0.2     | 1.8    | 0.0  | 0.0     | 0.0    | 0.0    | 0.0   | 0.0               | 0.0              | 0.0                  | 10.6±0.6 |  |       |
|       |             | MeOH/H <sub>2</sub> O | 76.2±1.1                                     | 0.2                                                        | 1.2 | 5.9  | 0.0     | 9.0    | 0.0  | 0.0     | 0.0    | 0.0    | 0.0   | 0.0               | 0.0              | 0.0                  | 16.3±0.7 |  |       |
|       |             | EtOH/H <sub>2</sub> O | 74.1±5.0                                     | 0.3                                                        | 0.7 | 9.4  | 0.0     | 6.9    | 0.0  | 0.0     | 0.0    | 0.0    | 0.0   | 0.0               | 0.0              | 0.0                  | 17.3±1.7 |  |       |

<sup>a</sup>Calculated using **Equation 1**. <sup>b</sup>Calculated using GC-FID analysis and **Equation 2**. <sup>c</sup>Monomer yield was calculated using NMR analysis with 1,3,5-tri-*tert*-butylbenzene as an internal standard. <sup>d</sup>A combined yield of dihydrocoumaric acid and methyl (or ethyl) dihydrocoumarate due to significant overlap of their NMR peaks.

MG (methyl-guaiacol). EG (ethyl-guaiacol). PG (propyl-guaiacol). P(ene)G (propylene-guaiacol). P(OH)G (propanol-guaiacol). PS (propyl-syringol). P(ene)S (propylene-syringol). P(OH)S (propanol-syringol). HC (dihydrocoumaric acid + methyl-dihydrocoumarate + ethyl-dihydrocoumarate). HFA (dihydroferulic acid). MHF (methyl-dihydroferulate). EHF (ethyl-dihydroferulate).

**Table S3.** Phenolic monomer and lignin oil yields on a biomass basis from FT-RCF of poplar, pine, switchgrass, and corn stover.

| Biomass     | Solvent               | Oil yield <sup>a</sup><br>(wt% total lignin) | Monophenolic monomer yield (wt% total lignin) <sup>b</sup> |     |     |         |        |     |         |        |        |       |                   |                    |     |          |
|-------------|-----------------------|----------------------------------------------|------------------------------------------------------------|-----|-----|---------|--------|-----|---------|--------|--------|-------|-------------------|--------------------|-----|----------|
|             |                       |                                              | MG                                                         | EG  | PG  | P(ene)G | P(OH)G | PS  | P(ene)S | P(OH)S | Phenol | E(OH) | HC <sup>c,d</sup> | $\frac{HF}{HFA}^c$ | MHF | total    |
| Poplar      | MeOH                  | 68.2±7.0                                     | 0.1                                                        | 0.2 | 2.8 | 1.6     | 5.3    | 4.2 | 0.0     | 11.0   | 0.0    | 0.0   | 0.0               | 0.0                | 0.0 | 25.2±1.7 |
|             | MeOH/H <sub>2</sub> O | 75.7±3.2                                     | 0.0                                                        | 0.0 | 0.2 | 0.1     | 5.4    | 1.4 | 0.7     | 7.2    | 0.0    | 0.0   | 0.0               | 0.0                | 0.0 | 15.0±1.1 |
| Switchgrass | MeOH                  | 88.9±12.4                                    | 0.0                                                        | 0.0 | 1.6 | 0.3     | 3.6    | 1.6 | 0.0     | 5.4    | 0.0    | 1.2   | 6.2               | 0.0                | 7.1 | 27.0±1.4 |
|             | MeOH/H <sub>2</sub> O | 104.9±7.0                                    | 0.0                                                        | 0.0 | 0.0 | 0.0     | 3.6    | 1.0 | 0.0     | 4.3    | 0.0    | 2.1   | 8.6               | 3.3                | 5.4 | 28.3±1.6 |
| Corn stover | MeOH                  | 94.2±7.0                                     | 0.0                                                        | 0.0 | 1.3 | 0.5     | 3.0    | 2.2 | 0.0     | 5.0    | 0.0    | 3.4   | 11.0              | 0.0                | 9.4 | 35.8±1.6 |
|             | MeOH/H <sub>2</sub> O | 96.7±5.5                                     | 0.0                                                        | 0.0 | 0.0 | 0.0     | 2.0    | 0.6 | 0.0     | 2.4    | 0.0    | 1.2   | 15.0              | 4.9                | 5.4 | 31.5±0.7 |
| Pine        | MeOH                  | 36.1±1.6                                     | 0.0                                                        | 0.0 | 2.6 | 0.0     | 3.9    | 0.0 | 0.0     | 0.0    | 0.0    | 0.0   | 0.0               | 0.0                | 0.0 | 6.5±0.1  |
|             | MeOH/H <sub>2</sub> O | 55.9±8.1                                     | 0.0                                                        | 0.0 | 0.2 | 0.0     | 6.1    | 0.0 | 0.0     | 0.0    | 0.0    | 0.0   | 0.0               | 0.0                | 0.0 | 6.3±0.5  |

<sup>a</sup>Calculated using Equation 1. <sup>b</sup>Calculated using GC-FID analysis and Equation 2. <sup>c</sup>Quantified by comparing with the NMR peak area of MHF which was pre-quantified with GC-FID and used as an internal standard. <sup>d</sup>A combined yield of dihydrocoumaric acid and methyl-dihydrocoumarate due to significant overlap of their NMR peaks.

EG (ethyl-guaiacol). PG (propyl-guaiacol). P(ene)G (propylene-guaiacol). P(OH)G (propanol-guaiacol). PS (propyl-syringol). P(ene)S (propylene-syringol). P(OH)S (propanol-syringol). HC (dihydrocoumaric acid + methyl-dihydrocoumarate). HFA (dihydroferulic acid). MHF (methyl-dihydroferulate).

**Table S4.** Summary of delignification, glucan/xylan retention, monomer yield, and oil yield.

| Solvent               | Biomass     | Delignification | Glucan retention | Xylan retention | Oil yield <sup>a</sup><br>(wt% total lignin) | Oil yield<br>(wt% dried biomass) | Pulp yield<br>(wt% dried biomass) | Monomer yield<br>(wt% total lignin) <sup>b</sup> |
|-----------------------|-------------|-----------------|------------------|-----------------|----------------------------------------------|----------------------------------|-----------------------------------|--------------------------------------------------|
| MeOH                  | Poplar      | 64.0%           | 98.4%            | 101.4%          | 68.2                                         | 17.7                             | 67.9                              | 25.2                                             |
|                       | Switchgrass | 64.6%           | 101.7%           | 100.2%          | 88.9                                         | 15.2                             | 70.5                              | 27.0                                             |
|                       | Corn stover | 70.9%           | 93.6%            | 92.9%           | 94.2                                         | 17.0                             | 65.6                              | 35.8                                             |
|                       | Pine        | 32.9%           | 104.9%           | 108.1%          | 36.1                                         | 12.1                             | 76.9                              | 6.5                                              |
| MeOH/H <sub>2</sub> O | Poplar      | 92.5%           | 86.1%            | 15.2%           | 75.7                                         | 19.7                             | 46.9                              | 15.0                                             |
|                       | Switchgrass | 94.5%           | 88.5%            | 17.4%           | 104.9                                        | 17.9                             | 37.6                              | 28.3                                             |
|                       | Corn stover | 92.5%           | 101.0%           | 21.9%           | 96.7                                         | 17.4                             | 47.3                              | 31.5                                             |
|                       | Pine        | 77.9%           | 88.0%            | 31.9%           | 55.9                                         | 18.7                             | 45.4                              | 6.3                                              |

<sup>a</sup>Calculated using Equation 1. <sup>b</sup>Calculated using Equation 2.

**Table S5.** Summary of monomer yield, oil yield, and pulp yield of batch and FT-RCF in literature and this study.

| Entry | Reaction type | Biomass     | Solvent                                                                 | Conditions                                                             | Monomer yield (wt% total lignin) <sup>a</sup>                     | Oil yield (wt% total lignin) <sup>a</sup> | Oil yield (wt% biomass) | Pulp yield (wt% biomass) | Ref.       |            |
|-------|---------------|-------------|-------------------------------------------------------------------------|------------------------------------------------------------------------|-------------------------------------------------------------------|-------------------------------------------|-------------------------|--------------------------|------------|------------|
| 1     |               |             | MeOH                                                                    | 30 bar H <sub>2</sub> , 215°C, 15wt% Ni/C                              | 20.8                                                              | 60.7                                      | 15.8                    | -                        | 1          |            |
| 2     |               |             | MeOH                                                                    | 30 bar H <sub>2</sub> , 200°C, 5 wt% Pd/C                              | 28.2 <sup>b</sup>                                                 | 52.0 <sup>c</sup>                         | 11.2                    | -                        | 2          |            |
| 3     |               | Poplar      | MeOH                                                                    | 30 bar H <sub>2</sub> , 230°C, 5 wt% Ru/C                              | 32.6                                                              | 65.1                                      | 16.9                    | -                        | This study |            |
| 3     |               |             | MeOH/H <sub>2</sub> O (1:1 v/v)                                         | 30 bar H <sub>2</sub> , 200°C, 5 wt% Pd/C                              | 41.6 <sup>b</sup>                                                 | 80.0 <sup>c</sup>                         | 17.3                    | -                        | 2          |            |
| 4     |               |             | MeOH/H <sub>2</sub> O (1:1 w/w)                                         | 30 bar H <sub>2</sub> , 230°C, 5 wt% Ru/C                              | 33.4                                                              | 71.4                                      | 18.5                    | -                        | This study |            |
| 5     |               |             | 2-PrOH/H <sub>2</sub> O (7:3 v/v)                                       | 220°C, Raney Ni                                                        | -                                                                 | -                                         | 26                      | 52                       | 3          |            |
| 6     |               |             | Pine + spruce                                                           | MeOH                                                                   | 30 bar H <sub>2</sub> , 250°C, 5 wt% Ru/C                         | 21.0                                      | 56.0 <sup>c</sup>       | 15.2                     | -          | 4          |
| 7     |               |             | MeOH                                                                    | 30 bar H <sub>2</sub> , 220°C, Ru/CNT                                  | 11.1                                                              | 78.8 <sup>d</sup>                         | -                       | -                        | 5          |            |
| 8     | Batch         | Pine        | MeOH                                                                    | 30 bar H <sub>2</sub> , 230°C, 5 wt% Ru/C                              | 12.7                                                              | 42.5                                      | 14.2                    | -                        | This study |            |
| 9     |               |             |                                                                         | EtOH/H <sub>2</sub> O (1:1 v/v)                                        | 210°C, Pd/C (5 mol%)                                              | 9.3                                       | 84.6 <sup>d</sup>       | -                        | 41.1       | 6          |
| 10    |               |             |                                                                         | MeOH/H <sub>2</sub> O (1:1 w/w)                                        | 30 bar H <sub>2</sub> , 230°C, 5 wt% Ru/C                         | 16.3                                      | 76.2                    | 25.5                     | -          | This study |
| 11    |               |             |                                                                         | MeOH                                                                   | 30 bar H <sub>2</sub> , 200°C, 5 wt% Ni/C                         | 28.6                                      | 59.0                    | 8.0                      | 73.0       | 7          |
| 12    |               |             |                                                                         | Corn Stover                                                            | MeOH                                                              | 30 bar H <sub>2</sub> , 230°C, 5 wt% Ru/C | 32.1                    | 82.8                     | 14.9       | -          |
| 13    |               |             | MeOH/H <sub>2</sub> O (1:1 w/w)                                         | 30 bar H <sub>2</sub> , 230°C, 5 wt% Ru/C                              | 31.0                                                              | 104.5                                     | 18.8                    | -                        | This study |            |
| 14    |               |             | MeOH                                                                    | 40 bar H <sub>2</sub> , 250°C, Ru/C                                    | 41.5                                                              | -                                         | -                       | 31.0                     | 8          |            |
| 15    |               | Switchgrass | MeOH                                                                    | 30 bar H <sub>2</sub> , 230°C, 5 wt% Ru/C                              | 31.6                                                              | 81.4                                      | 13.9                    | -                        | This study |            |
| 16    |               |             | MeOH/H <sub>2</sub> O (1:1 w/w)                                         | 30 bar H <sub>2</sub> , 230°C, 5 wt% Ru/C                              | 33.5                                                              | 96.7                                      | 16.5                    | -                        | This study |            |
| 17    |               | Miscanthus  | MeOH                                                                    | 30 bar H <sub>2</sub> , 220°C, Ru/CNT                                  | 26.0                                                              | 84.6 <sup>d</sup>                         | -                       | -                        | 5          |            |
| 18    |               |             | MeOH                                                                    | 110 bar H <sub>2</sub> 200 sccm, feed 2 mL/min, 225°C, 15 wt% Ni/C     | 22.0                                                              | 54.0                                      | 14.0                    | 67.3                     | 9          |            |
| 19    |               | Poplar      | MeOH                                                                    | 110 bar H <sub>2</sub> 200 sccm, feed 2 mL/min, 225°C, 5 wt% Ru/C      | 25.2                                                              | 68.2                                      | 17.7                    | -                        | This study |            |
| 20    | FT            |             | MeOH/H <sub>2</sub> O (1:1 v/v)                                         | 110 bar H <sub>2</sub> 200 sccm, feed 2 mL/min, 225°C, 5 wt% Ru/C      | 19.0                                                              | 92.9 <sup>d</sup>                         | -                       | 48.6                     | 9          |            |
| 21    |               |             |                                                                         | MeOH/H <sub>2</sub> O (1:1 w/w)                                        | 110 bar H <sub>2</sub> 200 sccm, feed 2 mL/min, 225°C, 5 wt% Ru/C | 15.0                                      | 75.7                    | 19.7                     | -          | This study |
| 22    |               | Birch       | MeOH/H <sub>2</sub> O (7:3 v/v), 2.8 g/L H <sub>3</sub> PO <sub>4</sub> | Feed 0.3 mL/min, 180°C (biomass bed), 200°C (catalyst bed), 5 wt% Pd/C | 39.0                                                              | 51.9                                      | 14.0                    | 39.0                     | 10         |            |

<sup>a</sup>Calculated based on total lignin <sup>b</sup>Calculated based on Klason lignin <sup>c</sup>Delignification calculated using lignin residual in pulp

## Quantification of hydroxycinnamate products

Hydroxycinnamate products from batch RCF reactions with switchgrass and corn stover were quantified via  $^1\text{H}$  NMR using 1,3,5 tri-*tert*-butylbenzene ( $\delta = 7.28$ , 3H, TTB) as an internal standard. From the RCF reaction mixture, 5 mL were dried using rotary evaporation to yield the RCF oil. Then, 1 mL of 1 g/L TTB was added to resolubilize, and the solution was filtered with a 0.2  $\mu\text{m}$  filter and transferred to an NMR tube. A  $^1\text{H}$  spectrum was acquired on a Bruker Neo Avance 400 MHz instrument equipped with a nitrogen cooled Prodigy cryoprobe using 32 scans, a sweep width of 20 ppm, and a delay of 3 seconds. Processing was performed on TopSpin 3.61 using a line broadening of 0.3 Hz. Figures were created with MestreNova.

The absence of double bond-containing products such as *p*-coumaric acid, ferulic acid, and esterified analogues was verified by the lack of resonances at  $\delta = 7.54$  ppm (coumarates) and  $\delta = 7.33$  ppm (ferulates). This indicates the complete hydrogenation of double bonds in hydroxycinnamates during RCF. Significant overlap between the dihydrocoumaric acid and the corresponding ester was observed, and therefore a single integration for both products is performed to quantify the combined yield. Dihydroferulic acid and its corresponding ester are well enough resolved to integrate both separately. The yield was calculated using the molecular weights of coumaric and ferulic acid so as not to bias the yields based on esterification/hydrogenation.

For RCF reactions in methanol, only the methyl esters were observed. However, for reactions in a methanol/water mixture, both the ester and acid products were present. Switchgrass and corn stover behaved differently ethanol reactions: only ethyl esters were observed for corn stover, but the switchgrass samples showed that the acid was present. In ethanol/H<sub>2</sub>O reactions, acids were present in an even greater amount than in the MeOH/H<sub>2</sub>O reactions. The following table shows the resonances we used:

**Table S6.** Resonances used for  $^1\text{H}$  quantification of hydroxycinnamate products.

| Analyte                 | $^1\text{H}$ NMR Resonance (ppm) |
|-------------------------|----------------------------------|
| Dihydrocoumaric acid    | 7.05                             |
| Methyl-dihydrocoumarate | 7.07                             |
| Ethyl-dihydrocoumarate  | 7.07                             |
| Dihydroferulic Acid     | 6.87                             |
| Methyl-dihydroferulate  | 6.85                             |
| Ethyl-dihydroferulate   | 6.85                             |

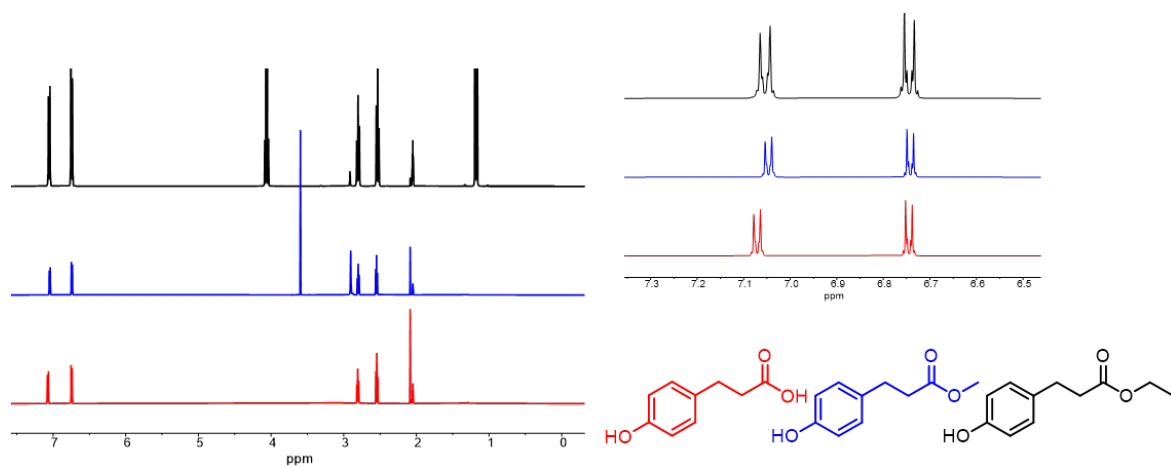

**Figure S1.**  $^1\text{H}$  NMR spectra of dihydrocoumaric acid (red), methyl-dihydrocoumarate (blue) and ethyl-dihydrocoumarate (black).

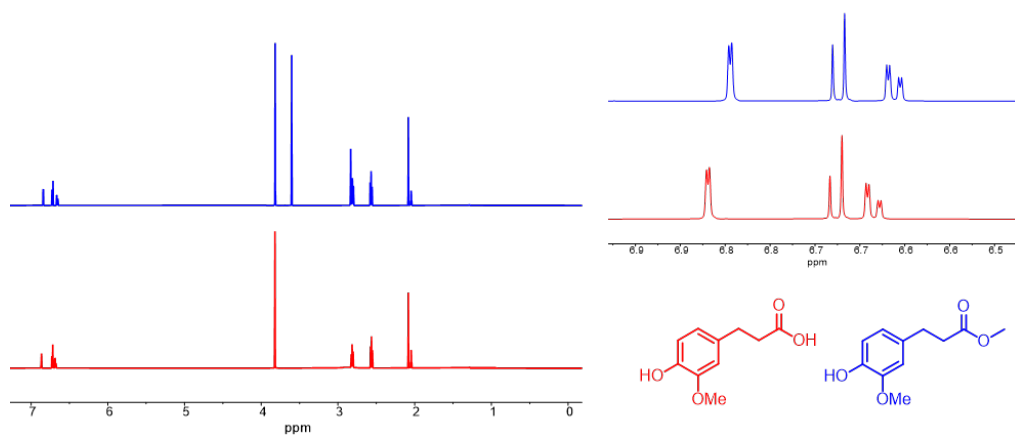

**Figure S2.**  $^1\text{H}$  NMR spectra of dihydrocoumaric acid (red) and methyl-dihydrocoumarate (blue).

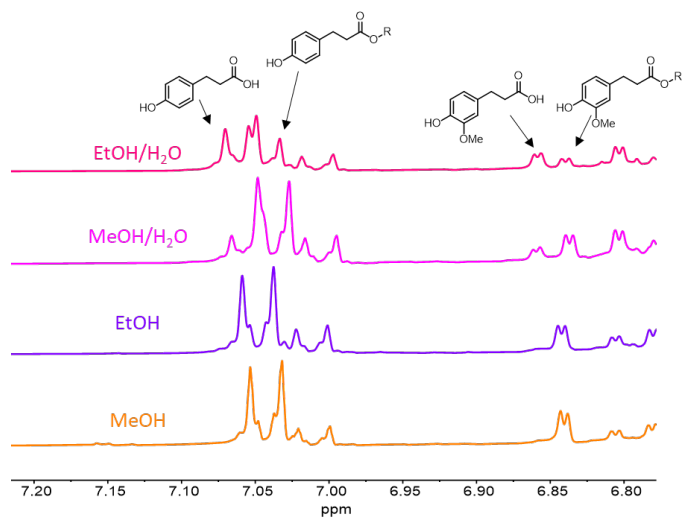

**Figure S3.**  $^1\text{H}$  NMR spectra of corn stover samples from batch RCF reactions.

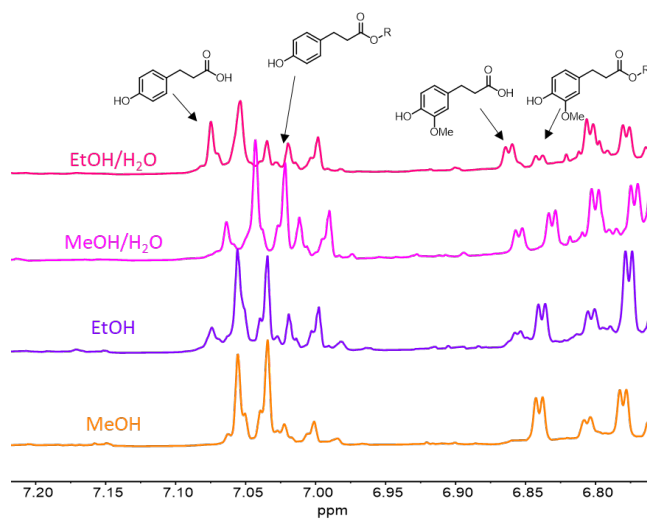

**Figure S4.**  $^1\text{H}$  NMR spectra of switchgrass samples from batch RCF reactions.



### Determination of water content in lignin oils by volumetric Karl Fischer titration

The lignin oils obtained from batch RCF of switchgrass and corn stover in methanol/water and L-L extraction were analyzed to determine their water content using volumetric Karl Fischer titrations, following the Laboratory Analytical Procedure (LAP) of the National Renewable Energy Laboratory entitled “Determination of Water Content in Bio-Oils by Volumetric Karl Fischer Titration” (2021) with slight modifications.<sup>11</sup> In short, the one-component titrant CombiTitrant 5 Keto was used to titrate in methanol (titration medium) the corresponding RCF oil sample previously dissolved in methanol to help its gravimetric addition; the process was followed electrochemically using a Metrohm 870 KF Titrino plus instrument, and the results reported with a confidence level of 95% (confidence interval was calculated as two times the standard deviation of 3 replicates).

Water content in lignin oils by volumetric Karl Fischer titration

| Substrate   | Water content (wt %) |
|-------------|----------------------|
| Switchgrass | 0.55 ± 0.16          |
| Corn stover | 0.46 ± 0.08          |

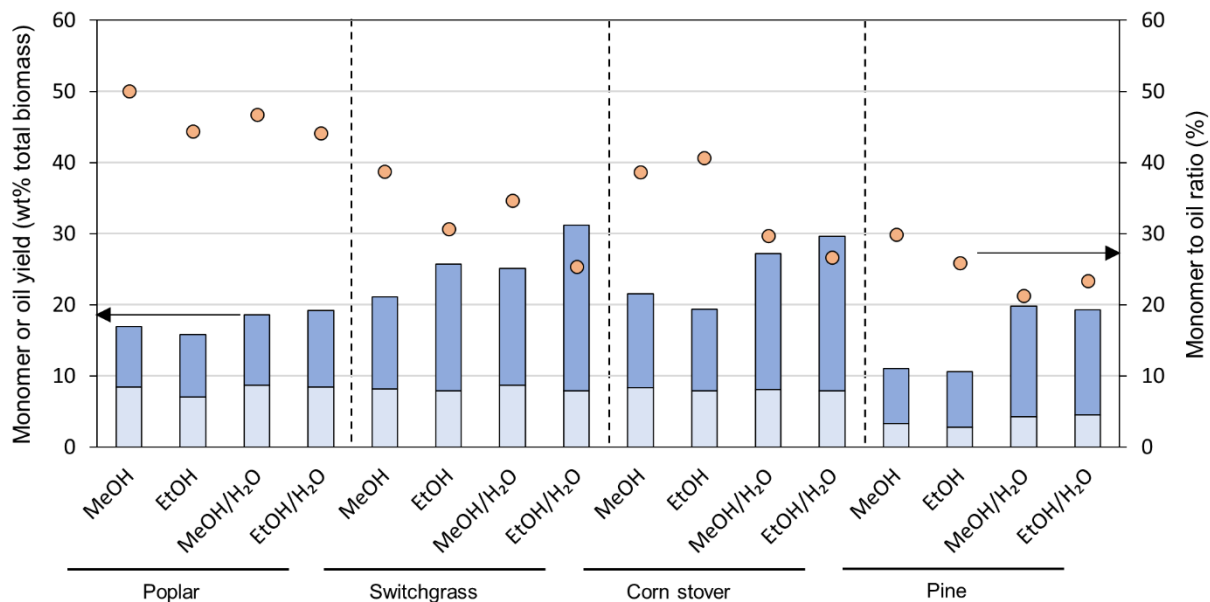

**Figure S5.** Monomer and oil yields and the resulting the monomer-to-oil ratios of batch RCF with different feedstocks and solvents. Circle dots represent the monomer-to-oil ratio. Light bars are monomer yields and oil yields are the sum of light and dark bars.

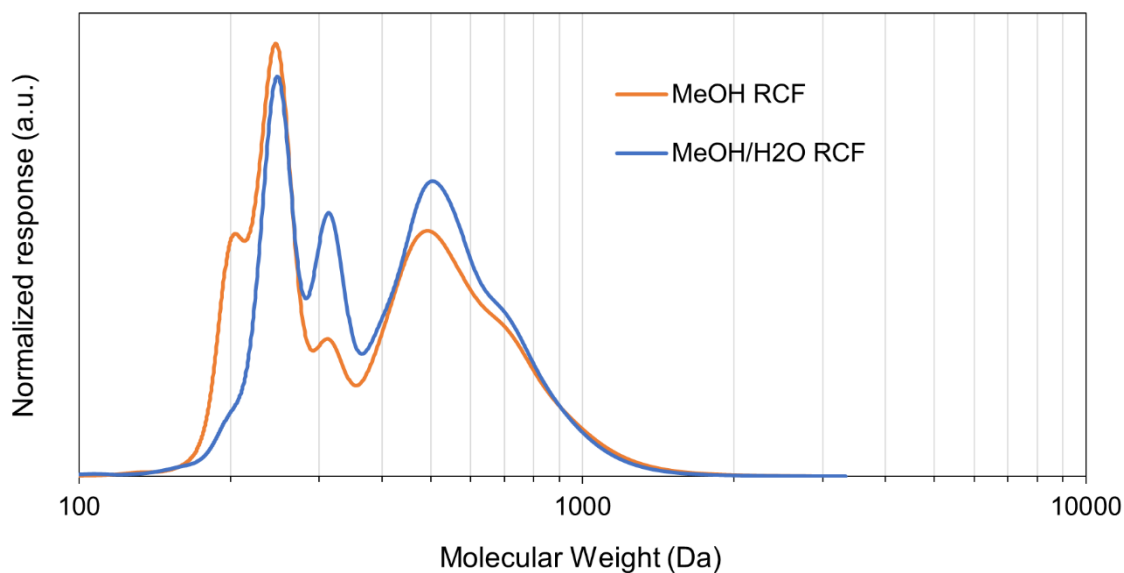

**Figure S6.** GPC traces of lignin oils from batch RCF of poplar with methanol and 50:50 w/w methanol/water.

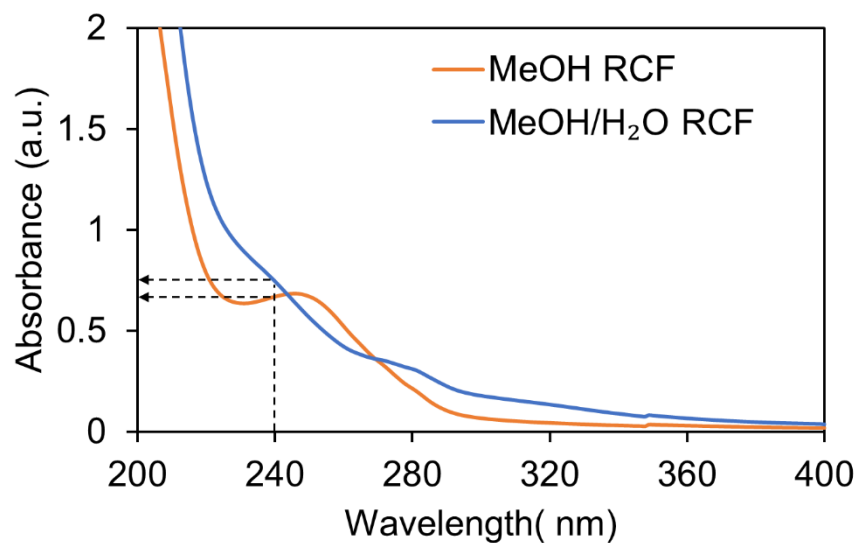

**Figure S7.** UV-Vis spectra of the aqueous phase obtained after FT-RCF, solvent removal, and liquid-liquid extraction. 240 nm was used for the quantification of lignin. MeOH RCF sample was diluted 100 times with water and MeOH/H<sub>2</sub>O RCF sample was diluted 25 times with water. FT-RCF conditions: 2 mL/min feed solvent, 2.7 g poplar, 0.9 g 5 wt% Ru/C (diluted with 2.1 g of fused silica), 1,600 psig, 200 sccm H<sub>2</sub>, 225°C, and 1 h heating ramp and 3 h run. The absorptivity,  $\epsilon$ , was measured to be 19.5 L g<sup>-1</sup> cm<sup>-1</sup> using FT-MeOH RCF oil.

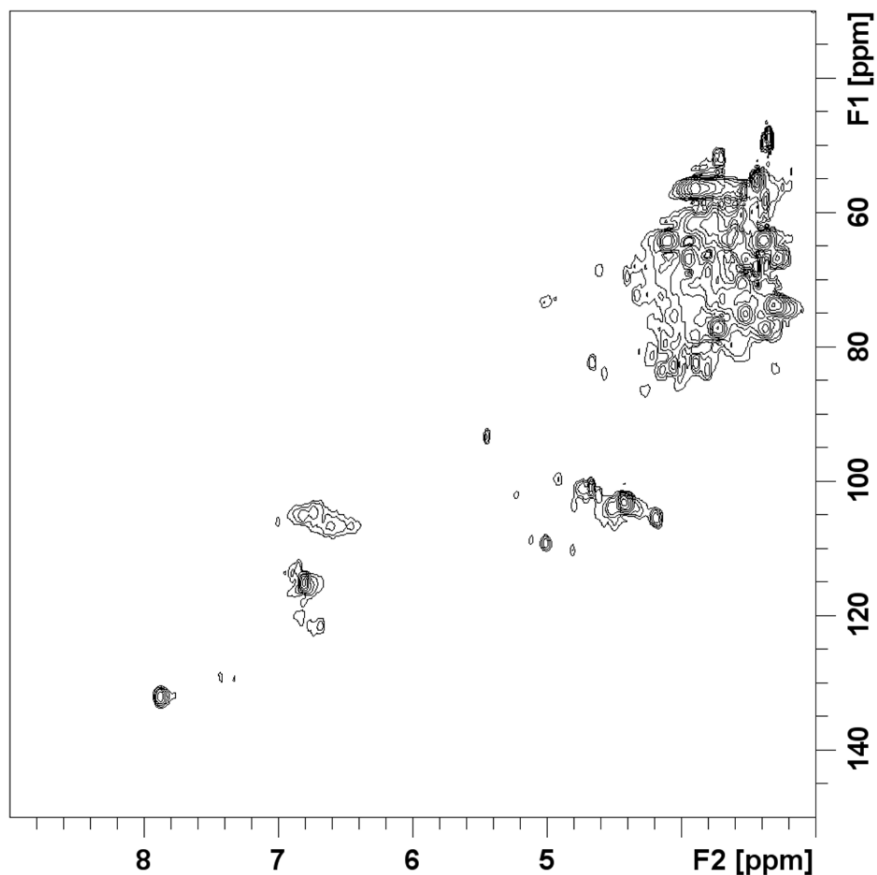

**Figure S8.** HSQC spectra of the isolated products from the aqueous phase after liquid-liquid extraction of RCF oil from methanol/water RCF of poplar.

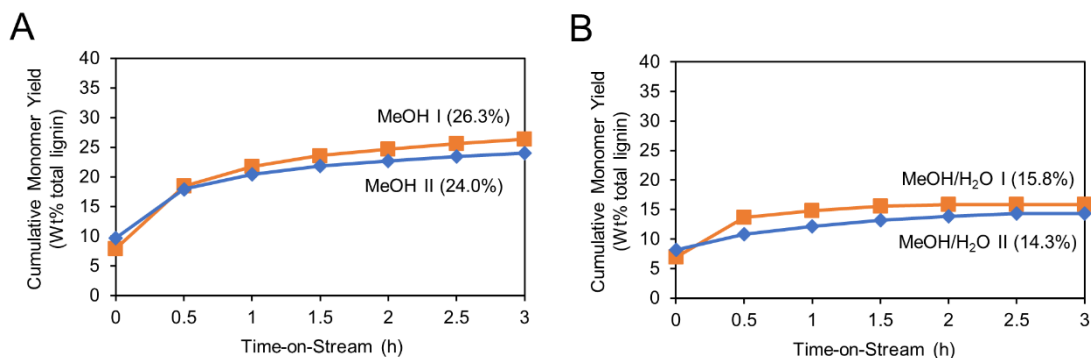

**Figure S9.** Reaction profiles of FT-RCF. Two different reactions were conducted with two biomass beds. Reaction conditions: 2 mL/min feed solvent, 2.7 g poplar, 0.9 g 5 wt% Ru/C (diluted with 2.1 g of fused silica), 1,600 psig, 200 sccm H<sub>2</sub>, 225°C, and 1 h heating ramp and 3 h run. **(A)** poplar-methanol. **(B)** poplar-methanol/water.

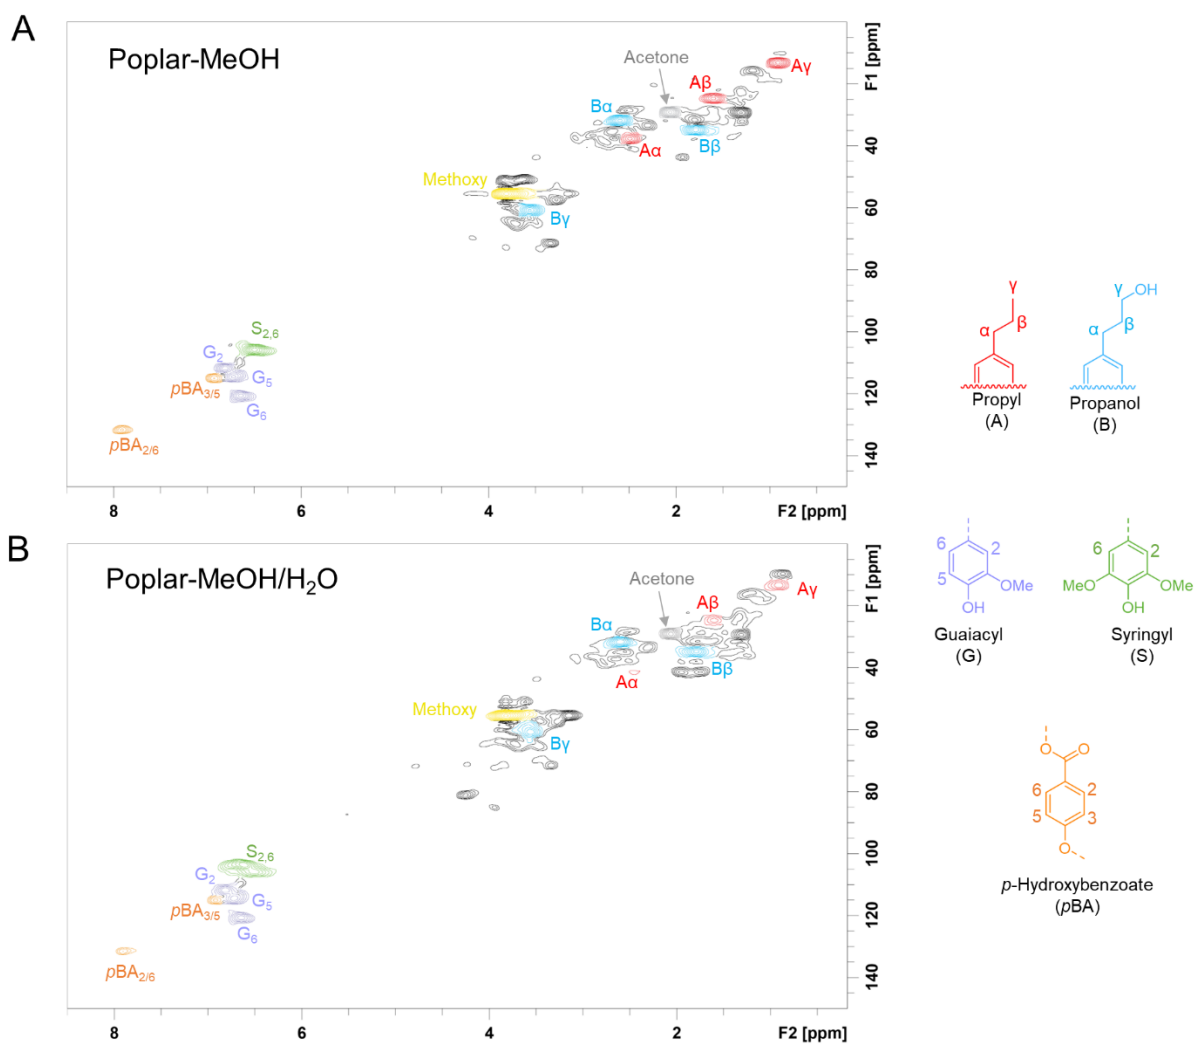

**Figure S10.** HSQC spectra of the isolated lignin oil from the organic phase after liquid-liquid extraction of RCF oil from RCF of poplar in (A) methanol (B) methanol/water mixture.

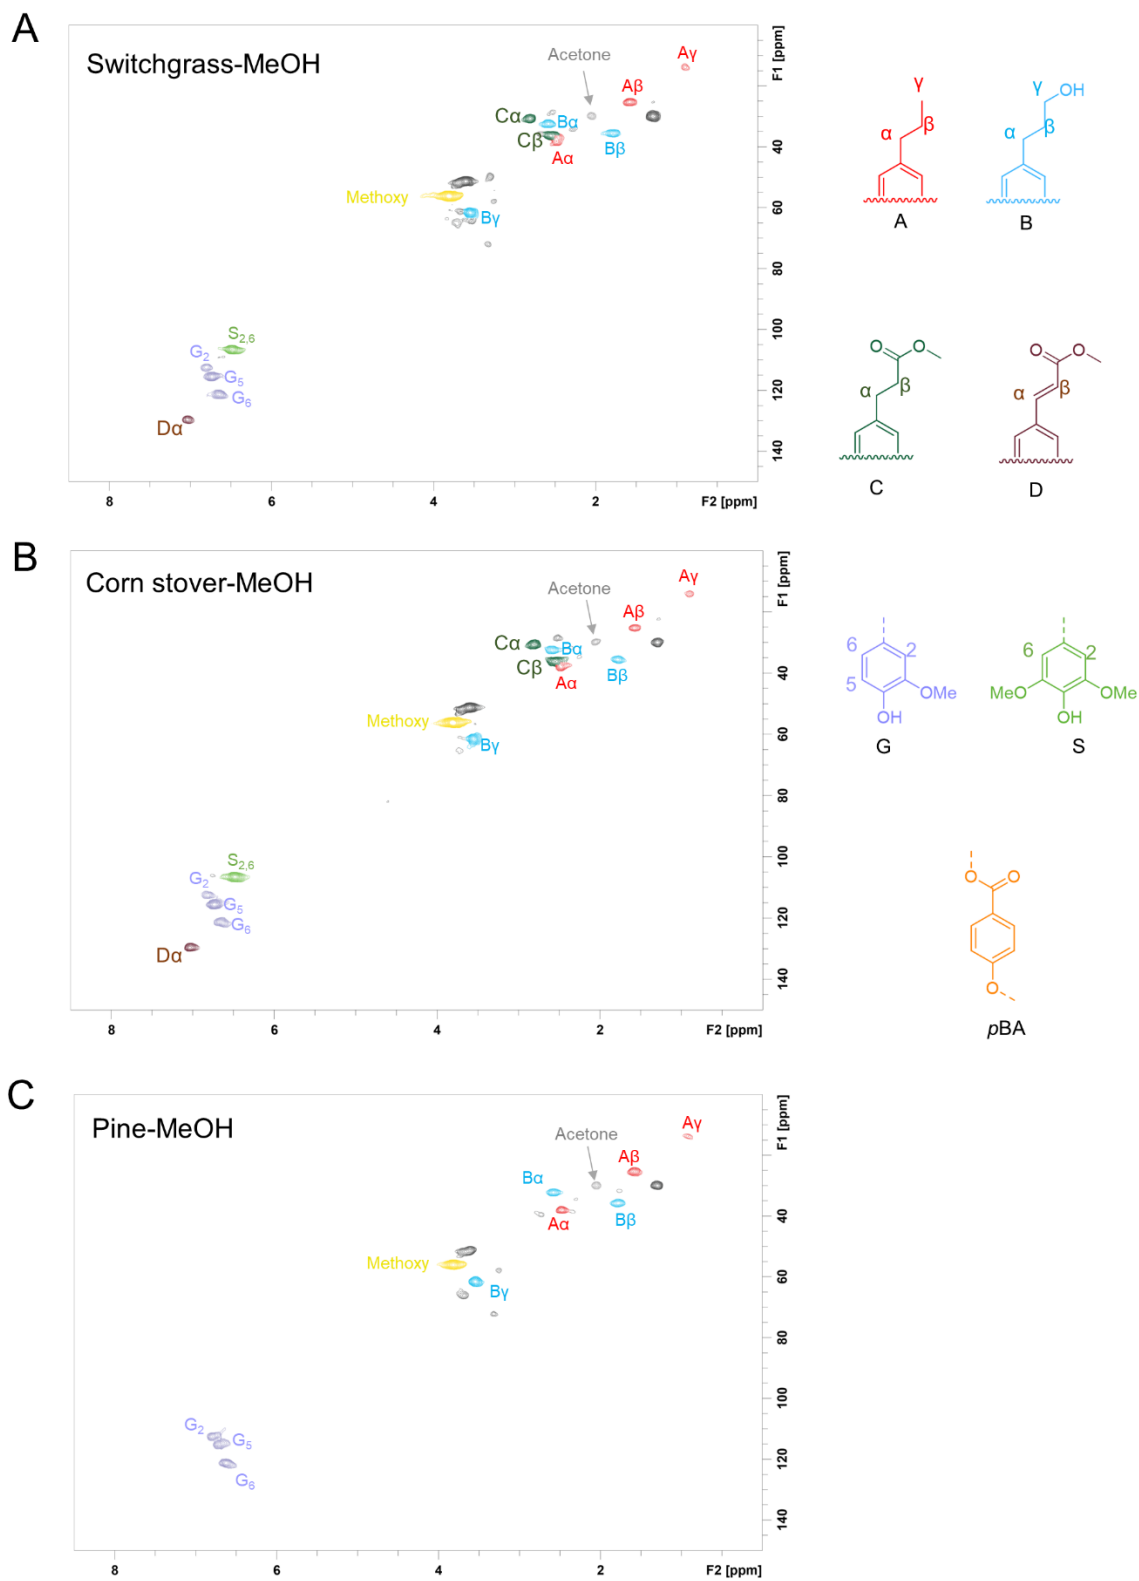

**Figure S11.** HSQC spectra of the lignin oil from methanol RCF with (A) switchgrass, (B) corn stover, and (C) pine.

## References

1. E. M. Anderson, M. L. Stone, M. J. Hülsey, G. T. Beckham and Y. Román-Leshkov, *ACS Sustainable Chemistry & Engineering*, 2018, **6**, 7951-7959.
2. T. Renders, S. Van den Bosch, T. Vangeel, T. Ennaert, S.-F. Koelewijn, G. Van den Bossche, C. M. Courtin, W. Schutyser and B. F. Sels, *ACS Sustainable Chemistry & Engineering*, 2016, **4**, 6894-6904.
3. P. Ferrini and R. Rinaldi, *Angew. Chem. Int. Ed.*, 2014, **53**, 8634-8639.
4. S. Van den Bosch, W. Schutyser, R. Vanholme, T. Driessen, S. F. Koelewijn, T. Renders, B. De Meester, W. J. J. Huijgen, W. Dehaen, C. M. Courtin, B. Lagrain, W. Boerjan and B. F. Sels, *Energy Environ. Sci.*, 2015, **8**, 1748-1763.
5. S. Su, L. P. Xiao, X. Chen, S. Wang, X. H. Chen, Y. Guo and S. R. Zhai, *ChemSusChem*, 2022, **15**, e202200365.
6. M. V. Galkin, A. T. Smit, E. Subbotina, K. A. Artemenko, J. Bergquist, W. J. Huijgen and J. S. M. Samec, *ChemSusChem*, 2016, **9**, 3280-3287.
7. E. M. Anderson, R. Katahira, M. Reed, M. G. Resch, E. M. Karp, G. T. Beckham and Y. Román-Leshkov, *ACS Sustain. Chem. Eng.*, 2016, **4**, 6940-6950.
8. E. O. Ebikade, N. Samulewicz, S. Xuan, J. D. Sheehan, C. Wu and D. G. Vlachos, *Green Chem.*, 2020, **22**, 7435-7447.
9. J. H. Jang, D. G. Brandner, R. J. Dreiling, A. J. Ringsby, J. R. Bussard, L. M. Stanley, R. M. Happs, A. S. Kovvali, J. I. Cutler, T. Renders, J. R. Bielenberg, Y. Román-Leshkov and G. T. Beckham, *Joule*, 2022, **6**, 1859-1875.
10. I. Kumaniaev, E. Subbotina, J. Sävmarker, M. Larhed, M. V. Galkin and J. S. M. Samec, *Green Chem.*, 2017, **19**, 5767-5771.
11. J. Miscall, E. Christensen, S. Deutch, R. Jackson and J. Ferrell III, *Determination of water content in biooils by volumetric Karl Fischer titration*, Report NREL/TP-5100-80968, National Renewable Energy Laboratory, Golden, Colorado, USA, 2021.
